# Supplementary material for: Regulation of cortical contractility and spindle positioning by the protein phosphatase 6 PPH-6 in one-cell stageC. elegansembryos
Source: Oxford University Press journal article supplement (doi:10.1242/dev.042754), 2009-12-29
Supplement: dev042754-sup-042754-figs1.pdf [file dev042754-sup-042754-figs1.pdf]

**A**

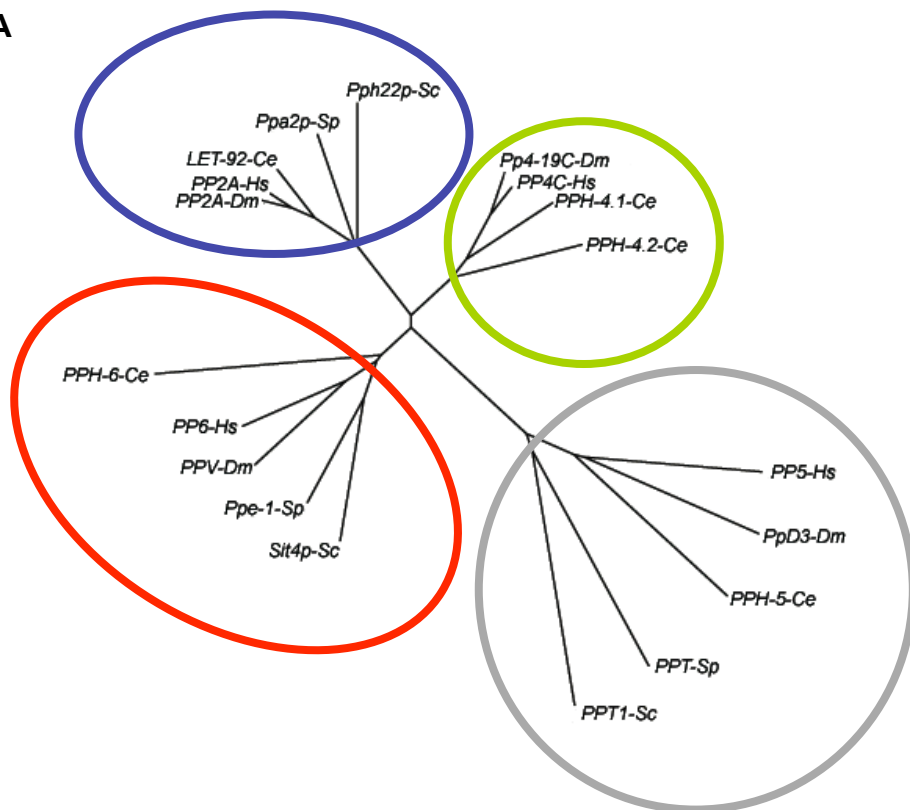

**B**

|            |                        |
|------------|------------------------|
| PPH-6-Ce   | NAVFDGSREKPD-RVVAPYFL  |
| PP6-Hs     | RAVFDSEKRVIPP-RTTTPYFL |
| PPV-Dm     | LAVFDAERVIPK-QNTTTPYFL |
| Ppe1-Sp    | -AVADEDRTVPPSRKRSEYFL  |
| Sit4p-Sc   | DDYIRESTANHN-NORAGYFL  |
| PP2A-Dm    | -DPAPRRGEPHVTRRTPDYFL  |
| PP2A-Hs    | -DPAPRRGEPHVTRRTPDYFL  |
| LET-92-Ce  | -DPAPRRGEPHVTRRTPDYFL  |
| Ppa2p-Sp   | -DPAPREGEPEVIARRTPDYFL |
| Pph22p-Sc  | -DPSVRRGEPHVTRRTPDYFL  |
| Pp4-19C-Dm | AAPQESRGIPSK-KPQADYFL  |
| PP4C-Hs    | AAPQETRGIPSK-KPVADYFL  |
| PPH-4.1-Ce | AAPQENRGAPAK-KPHADYFL  |
| PPH-4.2-Ce | AATVENRGEFKK-QPIAQYFL  |
