# Supplementary material for: Regulation of cortical contractility and spindle positioning by the protein phosphatase 6 PPH-6 in one-cell stageC. elegansembryos
Source: Oxford University Press journal article supplement (doi:10.1242/dev.042754), 2009-12-29

**A** Intensity Distribution of Myosin Foci During Pseudocleavage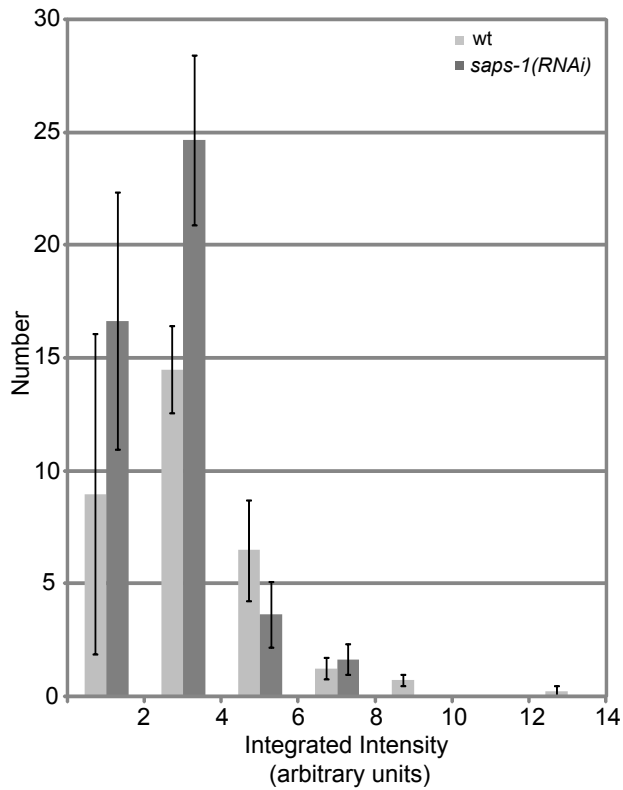**B** Intensity Distribution of Myosin Foci During Anaphase Onset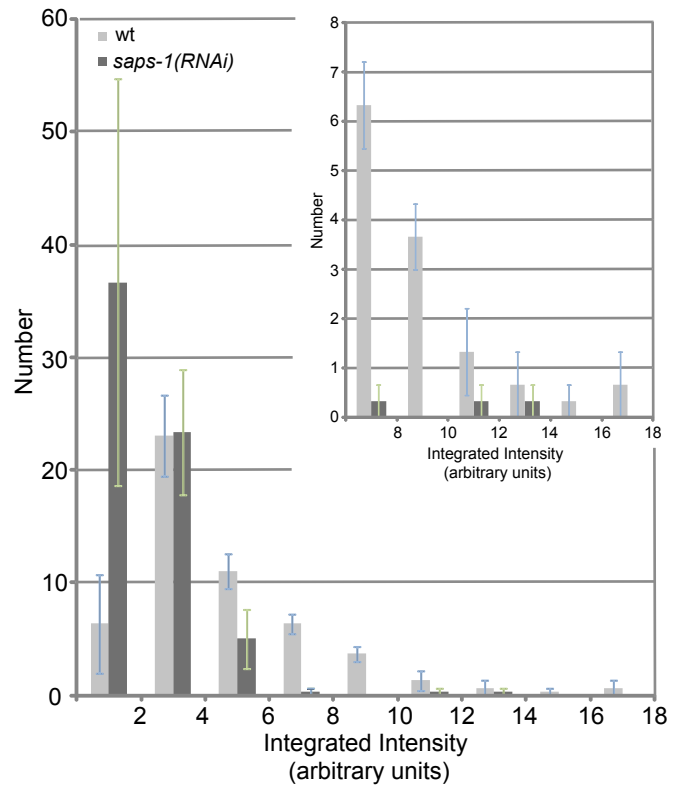**C** Relative Movement of Individual Foci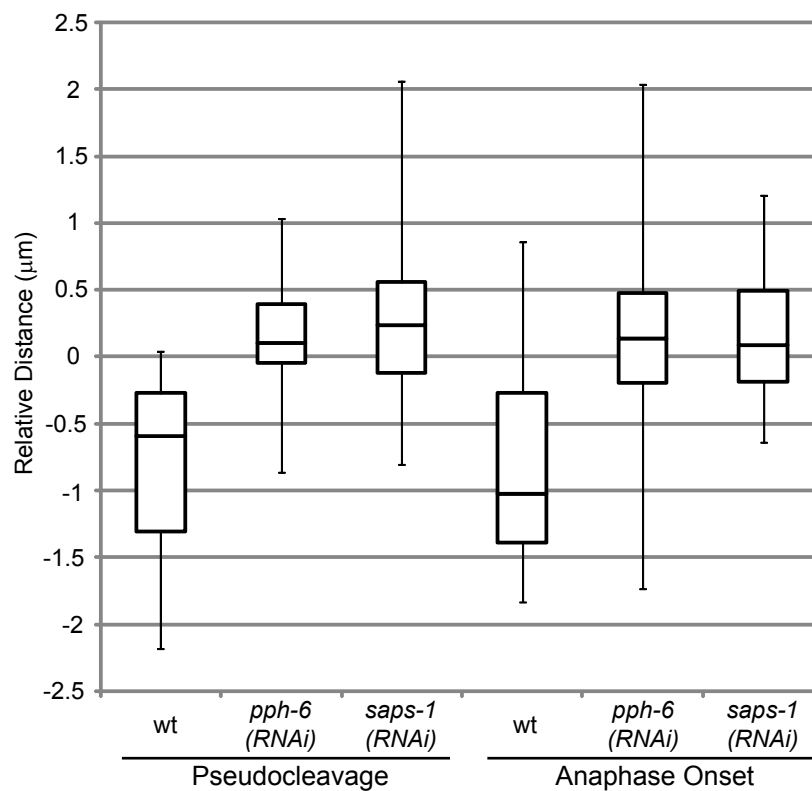

Supplement: dev042754-sup-figs5.pdf [file dev042754-sup-figs5.pdf]
